# Supplementary material for: Generation and Utilization of a Monoclonal Antibody against Hepatitis B Virus Core Protein for a Comprehensive Interactome Analysis
Source: Microorganisms. 2022 Nov 30;10(12):2381. doi: 10.3390/microorganisms10122381 (PMC9783060; doi:10.3390/microorganisms10122381)
Supplement: Supplementary file 1 [file microorganisms-10-02381-s001.zip › 20221130_Supplementary/20221130_Supplementary Table.xlsx]

## Sheet: Supplementary Table 1
Table S1. List of proteins differentially expressed between normoxic and hypoxic conditions based on quantitative proteome analysis.
											Normalized abundance
Accession	Peptide count	Unique peptides	Confidence score	p-value	q-value	Fold Change	Highest mean condition	Lowest mean condition	Mass	Description	20220729_20%O2_Insitu_1	20220729_20%O2_Insitu_2	20220729_20%O2_Insitu_3	20220729_1%O2_Insitu_1	20220729_1%O2_Insitu_2	20220729_1%O2_Insitu_3
P04075	11	11	612	6e-07	5.43e-05	2.58648	1%O2	20%O2	39395	Fructose-bisphosphate aldolase A	2019.18	2065.54	2134.95	5394.15	5382.45	5310.43
P54886	8	8	523.48	2.25e-06	9.71e-05	2.33279	1%O2	20%O2	87248	Delta-1-pyrroline-5-carboxylate synthase	303.381	287.944	296.723	703.632	697.064	670.938
P35527	4	4	310.63	3.22e-06	9.71e-05	2.49426	20%O2	1%O2	62027	Keratin, type I cytoskeletal 9	150.639	151.778	162.515	62.7878	61.6447	61.9687
P08729	4	1	256.69	0.000352917	0.00532291	1.73573	20%O2	1%O2	51354	Keratin, type II cytoskeletal 7	1118	1122.26	1202.78	665.475	610.431	707.725
Q14764	1	1	55.12	0.000529969	0.00651766	2.91618	20%O2	1%O2	99266	Major vault protein	164.069	149.31	152.895	64.7249	47.7715	47.3953
Q13428	7	7	415.56	0.000576175	0.00651766	1.71374	1%O2	20%O2	152015	Treacle protein	152.699	166.607	143.637	247.421	275.221	270.723
P32322	1	1	86.63	0.00107186	0.0107777	1.6631	1%O2	20%O2	33340	Pyrroline-5-carboxylate reductase 1, mitochondrial	177.039	164.045	149.658	273.417	288.068	254.668
P02795	1	1	50	0.00154523	0.0139837	41.8046	1%O2	20%O2	6037	Metallothionein-2	1.6875	0.831364	0	48.0616	20.0444	37.1941
Q02878	2	2	121.21	0.00186481	0.0153416	1.42232	20%O2	1%O2	32708	60S ribosomal protein L6	686.785	650.571	652.687	444.296	445.444	509.407
P35606	2	2	110.19	0.00207066	0.0156155	1.3805	20%O2	1%O2	102422	Coatomer subunit beta'	361.454	371.686	364.489	278.311	274.92	241.865
P13645	4	2	172.8	0.00250213	0.0159876	2.90567	20%O2	1%O2	58792	Keratin, type I cytoskeletal 10	128.976	142.11	111.558	42.8652	33.5629	55.2605
P07910	1	1	50.84	0.00265001	0.0159876	1.21175	20%O2	1%O2	33650	Heterogeneous nuclear ribonucleoproteins C1/C2	1686.71	1730.38	1769.4	1423.66	1365.44	1491.06
O60701	1	1	68.39	0.00417943	0.0177864	1.41569	20%O2	1%O2	54989	UDP-glucose 6-dehydrogenase	433.399	409.504	497.479	320.282	316.464	310.057
P53621	6	6	379.63	0.00427144	0.0177864	1.33413	20%O2	1%O2	138258	Coatomer subunit alpha	3550.34	3373.57	3929.28	2719.92	2800.58	2614.52
P52272	4	3	237.23	0.00429512	0.0177864	1.27109	20%O2	1%O2	77464	Heterogeneous nuclear ribonucleoprotein M	147.437	158.87	155.909	113.196	126.976	123.466
P04264	1	1	67.9	0.00460385	0.0177864	2.25622	20%O2	1%O2	65999	Keratin, type II cytoskeletal 1	185.406	161.134	216.908	102.692	76.749	70.2899
Q03252	13	8	734.31	0.00461059	0.0177864	1.19105	20%O2	1%O2	69906	Lamin-B2	541.131	549.04	591.697	459.244	473.722	479.119
O15027	3	3	142.92	0.0046364	0.0177864	1.51532	20%O2	1%O2	251738	Protein transport protein Sec16A	144.176	145.418	162.895	87.7003	104.616	106.293
Q9H0D6	1	1	89.89	0.00477716	0.0177864	1.34288	20%O2	1%O2	108513	5'-3' exoribonuclease 2	67.0716	63.2035	61.7847	51.9451	46.6532	44.422
P02545	23	22	1259.01	0.00478896	0.0177864	1.17702	20%O2	1%O2	74095	Prelamin-A/C	3000.04	2929.09	3199.36	2564.26	2643.16	2548.15
P11142	3	3	162.98	0.00491361	0.0177864	1.36702	20%O2	1%O2	70854	Heat shock cognate 71 kDa protein	173.66	177.975	178.624	132.053	115.974	139.868
P55060	4	4	222.59	0.00615083	0.0208404	1.35419	20%O2	1%O2	110346	Exportin-2	258.894	275.283	296.874	209.617	215.824	188.248
P61247	5	5	239.02	0.0081138	0.0253194	1.30265	1%O2	20%O2	29926	40S ribosomal protein S3a	257.401	263.901	256.543	354.045	356.124	303.091
Q6EEV6	1	1	87.25	0.00952618	0.028158	1.91067	20%O2	1%O2	10678	Small ubiquitin-related modifier 4	358.802	434.536	456.593	169.289	242.314	242.579
C9JRZ8	3	3	150.61	0.00964577	0.028158	1.36076	20%O2	1%O2	36514	Aldo-keto reductase family 1 member B15	118.43	126.703	130.126	100.463	93.6087	81.6994
Q12769	2	2	131.32	0.0100659	0.0284663	1.67235	20%O2	1%O2	162017	Nuclear pore complex protein Nup160	154.264	139.146	175.33	110.332	88.6277	81.3291
P08865	1	1	47.11	0.0113687	0.030991	1.67099	1%O2	20%O2	32833	40S ribosomal protein SA	72.5598	53.3035	49.6427	93.6273	101.397	98.2438
P53396	1	1	54.11	0.0117952	0.030991	Infinity	20%O2	1%O2	120762	ATP-citrate synthase	5.09853	18.5594	97.8239	0	0	0
Q13268	4	4	177.31	0.0119861	0.030991	1.43729	1%O2	20%O2	29908	Dehydrogenase/reductase SDR family member 2, mitochondrial	169.014	177.937	205.264	268.776	288.966	235.953
Q5JTH9	1	1	50.2	0.0137751	0.0346275	2.88364	20%O2	1%O2	143611	RRP12-like protein	40.3732	50.0094	64.3405	12.1517	15.5766	25.9272
P15924	21	20	1067.42	0.0160714	0.0393079	1.11688	1%O2	20%O2	331569	Desmoplakin	602.084	589.7	555.031	634.322	663.289	653.377
Q96KQ4	1	1	31.93	0.0179813	0.0428217	1.22011	1%O2	20%O2	119492	Apoptosis-stimulating of p53 protein 1	510.147	439.76	496.858	613.719	564.226	587.274
Q13247	1	1	53.42	0.0187325	0.0434668	1.33822	20%O2	1%O2	39563	Serine/arginine-rich splicing factor 6	561.97	531.62	551.069	457.382	418.501	353.108
Q8N1K5	1	1	40.2	0.0194756	0.0440614	1.24667	20%O2	1%O2	73406	Protein THEMIS	762.113	696.233	809.239	641.178	615.026	562.713
P19338	5	5	265.73	0.020848	0.0451855	1.46548	20%O2	1%O2	76568	Nucleolin	68.8388	83.55	92.0697	51.1311	53.9423	61.7383
Q10567	1	1	58.39	0.0209711	0.0451855	2.43987	20%O2	1%O2	104570	AP-1 complex subunit beta-1	79.3343	79.4188	80.4044	20.2662	28.2976	49.4568
P62424	3	3	159.12	0.0231387	0.0486965	1.45041	20%O2	1%O2	29977	60S ribosomal protein L7a	206.101	262.662	239.678	184.995	141.996	161.452
Q15149	26	23	1276.47	0.0237329	0.0488119	1.19443	20%O2	1%O2	531466	Plectin	846.286	795.061	830.116	733.507	707.783	627.863
Q9H3K6	1	1	42.81	0.025629	0.0515402	1.70633	20%O2	1%O2	10110	BolA-like protein 2	216.492	228.554	166.853	140.481	93.3175	124.806
Q9BRF8	1	1	60.72	0.0270652	0.0532453	1.31922	20%O2	1%O2	35526	Serine/threonine-protein phosphatase CPPED1	260.572	264.562	293.053	238.011	188.036	194.157
P23526	1	1	74.83	0.0295115	0.0557182	1.55036	20%O2	1%O2	47685	Adenosylhomocysteinase	630.661	704.235	673.628	496.973	472.799	325.753
Q7KZF4	4	4	183.31	0.0295537	0.0557182	1.18349	20%O2	1%O2	101934	Staphylococcal nuclease domain-containing protein 1	264.769	269.59	259.009	237.689	230.787	201.886
Q9BUF5	3	1	125.97	0.0339011	0.0583718	1.23484	1%O2	20%O2	49825	Tubulin beta-6 chain	2025.45	1724.53	1808.5	2497.04	2230.01	2136.78
Q9UNX3	2	2	69.71	0.0346894	0.0583718	1.98988	20%O2	1%O2	17246	60S ribosomal protein L26-like 1	64.0841	74.1436	124.11	42.3182	41.2847	48.233
Q13200	1	1	55.71	0.0350521	0.0583718	1.4527	20%O2	1%O2	100136	26S proteasome non-ATPase regulatory subunit 2	76.3128	84.1092	80.7478	68.7378	51.3966	45.881
P61981	2	2	82.75	0.0356401	0.0583718	1.14683	20%O2	1%O2	28285	14-3-3 protein gamma	221.812	218.941	224.473	206.876	177.895	195.284
Q71UM5	1	1	55.76	0.0359811	0.0583718	1.15363	20%O2	1%O2	9471	40S ribosomal protein S27-like	815.729	850.824	881.212	792.003	688.676	727.788
Q96I13	1	1	50.27	0.0360022	0.0583718	1.12233	1%O2	20%O2	47301	Protein ABHD8	31100	31760	33891.4	37976.4	34646.2	35964.2
P08123	1	1	53.89	0.0363179	0.0583718	1.20012	20%O2	1%O2	129235	Collagen alpha-2(I) chain	541.666	566.555	574.478	417.338	505.597	479.177
Q68BL7	1	1	36.01	0.0365486	0.0583718	1.30254	20%O2	1%O2	73009	Olfactomedin-like protein 2A	467.526	451.761	371.962	336.734	352.451	302.146
O14979	2	2	77.62	0.0372426	0.0583718	1.22324	1%O2	20%O2	46409	Heterogeneous nuclear ribonucleoprotein D-like	276.959	251.984	269.548	345.63	342.334	288.783
Q04695	7	1	444.26	0.0399094	0.0612139	1.19006	20%O2	1%O2	48076	Keratin, type I cytoskeletal 17	929.571	953.063	952.37	865.199	708.791	808.255
P02768	7	7	533.01	0.0430431	0.0649202	1.16058	1%O2	20%O2	69321	Serum albumin	280853	273453	292334	356377	322193	304026
Q96CW1	1	1	51.32	0.0449869	0.0667396	1.15384	20%O2	1%O2	49623	AP-2 complex subunit mu	193.201	202.923	192.659	186.335	159.653	164.295
Q92945	2	2	150.62	0.0464798	0.0675526	2.15078	20%O2	1%O2	73070	Far upstream element-binding protein 2	140.881	146.664	168.969	37.4294	98.4927	76.3336
P37198	1	1	50.61	0.0470279	0.0675526	1.51886	20%O2	1%O2	53222	Nuclear pore glycoprotein p62	70.177	67.6898	75.2325	33.8701	51.5292	54.9032
P61964	1	1	35.05	0.0499759	0.0706655	1.15257	20%O2	1%O2	36565	WD repeat-containing protein 5	145.645	129.563	127.497	122.486	115.978	110.934
P12270	3	3	122.79	0.0544997	0.0758767	1.15424	20%O2	1%O2	267131	Nucleoprotein TPR	123.05	127.411	116.346	101.395	116.062	100.334
Q8WYP5	1	1	54.68	0.0575912	0.0789659	5.98753	20%O2	1%O2	252342	Protein ELYS	24.1321	26.2824	24.0233	0	5.30026	7.13189
Q9UBF2	1	1	66.01	0.0588695	0.0795139	1.43666	20%O2	1%O2	97560	Coatomer subunit gamma-2	469.574	412.726	479.308	396.3	304.606	246.855
Q00839	2	2	83.05	0.0598668	0.0796717	1.34029	20%O2	1%O2	90528	Heterogeneous nuclear ribonucleoprotein U	263.815	243.035	289.844	241.211	175.16	178.048
P04406	3	3	117.05	0.0622695	0.0816683	1.34616	1%O2	20%O2	36030	Glyceraldehyde-3-phosphate dehydrogenase	60.7907	58.4875	42.6995	73.438	77.6246	66.9856
P29803	1	1	37.03	0.0647356	0.0836897	5.18689	1%O2	20%O2	42906	Pyruvate dehydrogenase E1 component subunit alpha, testis-specific form, mitochondrial	18.9595	19.459	2.09317	108.854	55.6118	45.6643
P49327	4	3	258.95	0.0669221	0.0841384	1.86013	20%O2	1%O2	273254	Fatty acid synthase	83.1668	131.219	140.355	46.7092	55.023	88.9759
Q02543	1	1	32.18	0.0669422	0.0841384	1.31131	20%O2	1%O2	20749	60S ribosomal protein L18a	87.907	90.6715	109.18	68.0282	65.2821	86.1331
O94973	1	1	64.53	0.0700095	0.0865619	1.33557	20%O2	1%O2	103895	AP-2 complex subunit alpha-2	212.992	214.168	257.209	196.376	138.661	177.378
Q92979	1	1	45.37	0.0741752	0.0890054	1.4598	20%O2	1%O2	26703	Ribosomal RNA small subunit methyltransferase NEP1	127.508	121.482	101.94	74.0494	104.037	62.3094
P09651	3	3	217.93	0.075266	0.0890054	1.06988	1%O2	20%O2	38723	Heterogeneous nuclear ribonucleoprotein A1	1391.67	1359.11	1391.37	1556.71	1427.55	1447.34
P62937	1	1	83.75	0.0762395	0.0890054	1.21459	20%O2	1%O2	18001	Peptidyl-prolyl cis-trans isomerase A	1332.43	1396.66	1627.64	1080.98	1305.97	1200.03
O94979	4	4	179.14	0.0767156	0.0890054	1.23101	20%O2	1%O2	132931	Protein transport protein Sec31A	194.648	184.966	148.881	136.876	146.081	146.36
Q14126	1	1	41.06	0.07786	0.0890564	1.47549	1%O2	20%O2	122218	Desmoglein-2	34.9784	37.9091	50.8435	75.9441	54.5566	52.0637
O00232	1	1	44.93	0.0787277	0.0890564	1.12921	1%O2	20%O2	52871	26S proteasome non-ATPase regulatory subunit 12	63.447	55.7728	62.6099	64.987	72.5582	67.7789
Q7Z5K2	1	1	31.33	0.0806853	0.090144	1.23586	1%O2	20%O2	132863	Wings apart-like protein homolog	297.211	215.463	257.076	307.151	326.338	317.817
P62266	1	1	38.28	0.0834051	0.0920463	1.13384	20%O2	1%O2	15798	40S ribosomal protein S23	85.4589	84.9464	76.1668	67.1932	77.1022	73.1706
P58107	1	1	39.02	0.0854441	0.0931604	2.22978	20%O2	1%O2	555316	Epiplakin	263.492	224.039	208.054	186.377	43.3482	82.2257
P20700	8	5	401.32	0.0921561	0.0986993	1.10858	20%O2	1%O2	66368	Lamin-B1	912.385	954.486	985.556	865.803	792.654	914.593
Q16658	1	1	36.99	0.0927056	0.0986993	1.23794	20%O2	1%O2	54496	Fascin	539.156	577.987	564.661	478.649	369.218	510.68
Q9UM00	2	2	79.1	0.0962766	0.100941	1.13543	20%O2	1%O2	27061	Calcium load-activated calcium channel	309.514	313.021	347.79	261.212	305.726	287.651
P29401	3	3	117.16	0.0974289	0.100941	1.21218	20%O2	1%O2	67835	Transketolase	153.386	147.889	183.828	120.375	147.069	132.748
P13639	6	6	320.95	0.0981574	0.100941	1.06801	20%O2	1%O2	95277	Elongation factor 2	768.186	744.855	780.834	742.701	727.244	677.867
O95613	1	1	43.43	0.10441	0.105654	1.31749	20%O2	1%O2	377806	Pericentrin	484.81	491.128	566.938	415.534	298.771	456.768
P06733	4	4	196.91	0.105076	0.105654	1.39435	1%O2	20%O2	47139	Alpha-enolase	369.015	346.406	223.597	488.588	421.463	399.266
Q9H0C2	1	1	56.68	0.110284	0.109651	1.50794	20%O2	1%O2	34999	ADP/ATP translocase 4	185.511	191.159	219.031	193.441	104.011	97.5917
P62241	1	1	46.09	0.111556	0.109651	3.2191	20%O2	1%O2	24190	40S ribosomal protein S8	21.088	30.8575	22.3718	23.0864	0	0
Q14847	3	3	147.18	0.112685	0.109651	1.18611	1%O2	20%O2	29698	LIM and SH3 domain protein 1	247.464	290.566	316.266	356.399	307.268	349.623
P22626	4	4	221.82	0.114601	0.110329	1.07139	20%O2	1%O2	37407	Heterogeneous nuclear ribonucleoproteins A2/B1	638.908	622.792	620.607	625.298	569.695	561.886
P35268	1	1	47.61	0.116846	0.111306	1.43296	20%O2	1%O2	14778	60S ribosomal protein L22	117.888	101.673	134.815	95.5798	94.9888	56.7348
Q09666	1	1	36.42	0.122887	0.114887	1.27751	1%O2	20%O2	628699	Neuroblast differentiation-associated protein AHNAK	165.895	136.874	129.054	177.966	217.936	155.759
P61026	1	1	37.45	0.130457	0.120467	1.22183	20%O2	1%O2	22527	Ras-related protein Rab-10	194.422	163.675	182.581	133.166	177.365	131.984
Q99439	4	4	167.16	0.133472	0.122007	1.1322	1%O2	20%O2	33675	Calponin-2	249.034	229.337	281.804	291.131	269.905	299.633
P30086	2	2	96.6	0.137842	0.124741	1.35332	1%O2	20%O2	21044	Phosphatidylethanolamine-binding protein 1	202.63	185.619	171.126	276.459	185.174	295.38
P48643	1	1	45.68	0.151234	0.134176	4.60939	20%O2	1%O2	59633	T-complex protein 1 subunit epsilon	20.886	33.0067	79.0548	0	11.4306	17.4122
P62979	1	1	57.08	0.162601	0.140665	1.20675	20%O2	1%O2	17953	Ubiquitin-40S ribosomal protein S27a	752.508	770.738	917.169	799.77	582.011	640.524
P32969	1	1	41.62	0.163211	0.140665	1.72443	20%O2	1%O2	21850	60S ribosomal protein L9	98.4108	83.1675	72.087	92.1346	30.517	24.4498
Q15717	1	1	40.01	0.171293	0.146238	Infinity	20%O2	1%O2	36069	ELAV-like protein 1	0	2.89733	27.7128	0	0	0
P38159	1	1	73.21	0.173059	0.146366	1.12778	20%O2	1%O2	42306	RNA-binding motif protein, X chromosome	344.918	314.666	299.763	312.112	252.641	285.897
O00151	1	1	80.54	0.181261	0.149279	1.41276	1%O2	20%O2	36049	PDZ and LIM domain protein 1	320.472	307.194	270.576	585.918	367.757	315.329
P53992	1	1	57.69	0.181453	0.149279	88.2018	20%O2	1%O2	118249	Protein transport protein Sec24C	0	15.3477	93.1846	0	0	1.2305
Q2TV78	1	1	38.51	0.18401	0.149426	1.14023	1%O2	20%O2	79642	Putative macrophage stimulating 1-like protein	2854.79	2628.02	3048.82	3635.37	3216.12	2876.48
P00352	1	1	51.05	0.185146	0.149426	1.23844	20%O2	1%O2	54827	Retinal dehydrogenase 1	258.655	278.157	331.058	284.493	227.348	188.939
P61313	2	2	106.27	0.189864	0.149426	1.15246	20%O2	1%O2	24131	60S ribosomal protein L15	915.009	855.236	834.932	894.773	695.773	669.99
P35580	7	4	294.21	0.190669	0.149426	1.0619	1%O2	20%O2	228858	Myosin-10	188.248	169.468	173.257	194.249	189.102	180.486
P62917	1	1	55.25	0.191539	0.149426	2.17674	20%O2	1%O2	28007	60S ribosomal protein L8	22.954	33.7517	21.1041	0	32.549	3.19709
Q8N9Q2	1	1	69.1	0.202175	0.156376	1.21262	20%O2	1%O2	18166	Protein SREK1IP1	370.123	421.427	513.122	407.438	308.013	360.464
Q9Y262	2	2	79.11	0.209508	0.160674	1.47855	20%O2	1%O2	66684	Eukaryotic translation initiation factor 3 subunit L	169.793	184.957	227.24	165.762	67.1024	160.758
P47914	1	1	65.43	0.213286	0.161007	1.74656	20%O2	1%O2	17741	60S ribosomal protein L29	67.3787	52.2359	46.331	9.90439	46.8766	38.2321
O75396	1	1	51.65	0.213501	0.161007	2.06391	20%O2	1%O2	24578	Vesicle-trafficking protein SEC22b	20.9684	35.6058	49.6737	4.08218	17.1153	30.2814
P02743	1	1	40.86	0.217932	0.161928	1.10504	1%O2	20%O2	25371	Serum amyloid P-component	194.318	169.922	165.097	209.731	196.673	178.533
P18124	2	2	122.29	0.221293	0.161928	1.49691	20%O2	1%O2	29207	60S ribosomal protein L7	176.55	138.486	111.683	49.5316	122.307	113.229
P49790	1	1	64.3	0.239679	0.172142	1.08526	20%O2	1%O2	153843	Nuclear pore complex protein Nup153	166.322	150.048	139.927	143.217	145.081	132.151
P06753	1	1	47.26	0.249365	0.177688	1.7559	1%O2	20%O2	32930	Tropomyosin alpha-3 chain	269.647	70.8693	35.0824	308.276	215.408	135.829
Q13151	1	1	122.44	0.260479	0.184158	1.41089	1%O2	20%O2	30822	Heterogeneous nuclear ribonucleoprotein A0	53.8959	77.4433	103.569	73.9633	124.002	133.464
O00425	1	1	35.94	0.268529	0.188378	1.21018	20%O2	1%O2	63666	Insulin-like growth factor 2 mRNA-binding protein 3	133.765	139.5	199.101	115.883	137.524	136.922
Q9P2E9	5	5	281.03	0.281764	0.196142	1.1193	20%O2	1%O2	152365	Ribosome-binding protein 1	269.756	270.702	266.822	201.863	283.692	235.681
Q12906	1	1	38.02	0.284859	0.196782	1.39853	1%O2	20%O2	95279	Interleukin enhancer-binding factor 3	48.1865	73.4241	33.3093	49.6424	77.0755	89.9417
P20073	1	1	62.11	0.293457	0.198987	1.29977	1%O2	20%O2	52706	Annexin A7	28.599	27.8725	13.6862	25.7988	31.2235	34.1666
Q9UL25	1	1	72.55	0.294647	0.198987	2.62774	20%O2	1%O2	24332	Ras-related protein Rab-21	2.96909	18.2183	23.5323	0	2.60771	14.4106
P13010	1	1	44.69	0.30094	0.20095	1.2168	20%O2	1%O2	82652	X-ray repair cross-complementing protein 5	212.392	270.952	325.958	233.806	179.411	251.889
Q9GZV4	1	1	61.8	0.302834	0.20095	1.42891	20%O2	1%O2	16782	Eukaryotic translation initiation factor 5A-2	82.4656	129.355	144.602	42.935	127.661	78.8397
Q00341	2	1	78.27	0.304216	0.20095	1.32532	20%O2	1%O2	141368	Vigilin	42.563	35.7754	65.1231	46.8508	32.5682	28.8279
P16435	1	1	56.16	0.309637	0.203049	1.14349	1%O2	20%O2	76641	NADPH--cytochrome P450 reductase	227.228	232.136	194.159	289.501	249.293	208.504
Q14240	1	1	85.8	0.318594	0.207419	1.11327	20%O2	1%O2	46373	Eukaryotic initiation factor 4A-II	277.036	263.368	281.641	297.36	226.867	214.177
Q8N1F7	2	2	118.37	0.321544	0.207845	1.25656	20%O2	1%O2	93430	Nuclear pore complex protein Nup93	139.386	116.064	116.434	130.929	59.1004	105.924
O00505	1	1	42.18	0.343013	0.219792	1.62973	1%O2	20%O2	57775	Importin subunit alpha-4	68.9439	40.254	0.666632	48.6675	69.3158	61.0661
P17858	1	1	63.49	0.344884	0.219792	1.22226	20%O2	1%O2	84964	ATP-dependent 6-phosphofructokinase, liver type	129.5	136.764	119.785	146.364	103.706	65.7796
Q6ZV73	1	1	31.11	0.349583	0.220209	1.15751	1%O2	20%O2	160714	FYVE, RhoGEF and PH domain-containing protein 6	425.396	524.632	623.365	504.473	643.426	673.324
O75083	1	1	53.13	0.350406	0.220209	1.09259	1%O2	20%O2	66152	WD repeat-containing protein 1	78.3159	65.0734	59.9952	77.8201	68.379	76.0169
Q15365	1	1	72.61	0.360228	0.224164	1.12285	1%O2	20%O2	37474	Poly(rC)-binding protein 1	365.471	287.635	242.276	358.059	315.368	331.956
P00390	2	1	80.03	0.364441	0.224164	1.14671	20%O2	1%O2	56221	Glutathione reductase, mitochondrial	47.8453	54.5721	66.6398	41.7196	48.4004	57.3079
P07900	3	1	151.79	0.366274	0.224164	3.38803	20%O2	1%O2	84607	Heat shock protein HSP 90-alpha	2.33623	1.63396	15.6205	2.51779	1.30208	1.96246
O75146	1	1	91.44	0.368188	0.224164	1.16927	20%O2	1%O2	119315	Huntingtin-interacting protein 1-related protein	18.5108	20.7253	19.3979	11.6316	16.6883	21.826
P14923	3	3	140.82	0.374001	0.224164	1.24821	20%O2	1%O2	81693	Junction plakoglobin	119.161	106.173	108.511	46.1224	130.958	90.3795
Q9Y490	4	4	213.15	0.374267	0.224164	1.25582	20%O2	1%O2	269599	Talin-1	48.8423	75.3088	72.3315	60.8839	33.0511	62.5232
P62888	2	2	101.46	0.377458	0.224164	1.16353	20%O2	1%O2	12776	60S ribosomal protein L30	110.082	122.751	157.122	118.109	88.7213	128.318
P26373	3	3	113.83	0.381469	0.224164	1.11905	20%O2	1%O2	24247	60S ribosomal protein L13	319.621	294.797	295.599	342.762	224.944	245.5
P60660	1	1	37.77	0.394748	0.230471	1.1177	1%O2	20%O2	16919	Myosin light polypeptide 6	97.0394	89.6543	73.565	102.819	81.7125	106.359
O76021	2	2	126.15	0.398437	0.230528	1.1504	20%O2	1%O2	54939	Ribosomal L1 domain-containing protein 1	48.8683	41.5617	58.1874	36.82	53.8017	38.5662
P35637	1	1	56.39	0.399942	0.230528	1.32876	1%O2	20%O2	53394	RNA-binding protein FUS	44.6798	45.2811	21.4981	63.6049	52.3507	32.1469
P84103	1	1	44.7	0.433331	0.246632	1.0499	1%O2	20%O2	19318	Serine/arginine-rich splicing factor 3	234.412	207.88	218.523	215.255	249.55	228.982
P15531	1	1	95.28	0.436416	0.246836	1.32179	20%O2	1%O2	17138	Nucleoside diphosphate kinase A	52.9294	34.9938	58.1247	49.7667	10.1615	50.5643
Q13813	3	3	145.51	0.461811	0.259576	1.23527	1%O2	20%O2	284364	Spectrin alpha chain, non-erythrocytic 1	145.572	123.073	39.7024	153.519	116.371	111.003
Q15637	1	1	74.13	0.469902	0.262494	1.07779	20%O2	1%O2	68286	Splicing factor 1	112.556	116.156	98.1022	118.607	89.5371	95.0838
P62826	4	4	209.68	0.478698	0.265087	1.07686	1%O2	20%O2	24408	GTP-binding nuclear protein Ran	621.946	627.552	472.95	661.099	567.51	626.228
Q92900	1	1	43.2	0.48333	0.265087	1.42809	1%O2	20%O2	124267	Regulator of nonsense transcripts 1	47.0091	24.0755	5.23091	43.6467	49.9351	15.4035
P61289	1	1	65.93	0.483331	0.265087	1.28093	1%O2	20%O2	29488	Proteasome activator complex subunit 3	48.2135	52.8562	5.60736	60.8517	29.8777	45.9164
Q14789	1	1	68.35	0.498362	0.269406	1.08568	1%O2	20%O2	375790	Golgin subfamily B member 1	120.638	161.386	181.284	176.72	154.853	171.43
P62263	1	1	56.48	0.501109	0.269406	1.21242	20%O2	1%O2	16263	40S ribosomal protein S14	114.52	92.5385	58.6177	68.4741	60.7999	89.8542
P09496	1	1	45.36	0.502388	0.269406	1.411	1%O2	20%O2	27060	Clathrin light chain A	173.491	119.351	54.8758	130.854	269.411	90.3648
P14866	1	1	46.14	0.503114	0.269406	1.08976	1%O2	20%O2	64092	Heterogeneous nuclear ribonucleoprotein L	204.388	170.828	153.2	224.365	178.179	173.3
Q15942	1	1	53.56	0.508031	0.270438	1.62986	1%O2	20%O2	61238	Zyxin	31.0528	2.01771	0	37.6634	14.7403	1.49657
Q08211	1	1	45.7	0.514584	0.272325	1.02303	1%O2	20%O2	140869	ATP-dependent RNA helicase A	635.053	645.089	583.409	648.617	632.845	625.001
Q9Y2Z2	1	1	42.04	0.533771	0.280837	1.03729	20%O2	1%O2	79914	Protein MTO1 homolog, mitochondrial	155.582	142.562	161.479	136.716	156.233	150.152
P48444	4	4	168.27	0.542388	0.283721	1.07288	20%O2	1%O2	57174	Coatomer subunit delta	511.239	484.544	395.837	473.521	446.838	376.727
Q8IYD1	1	1	46.33	0.568175	0.292379	1.81445	20%O2	1%O2	68840	Eukaryotic peptide chain release factor GTP-binding subunit ERF3B	4.03847	25.7473	84.2801	19.7122	43.153	0
P26641	1	1	62.58	0.568632	0.292379	1.20889	20%O2	1%O2	50087	Elongation factor 1-gamma	45.4055	0	18.3611	18.3964	18.2422	16.1093
Q969Q0	1	1	37.54	0.578238	0.295638	1.14504	1%O2	20%O2	12461	60S ribosomal protein L36a-like	144.433	70.7484	51.8072	74.9459	129.046	101.72
P04792	2	2	126.02	0.585538	0.296477	1.05314	20%O2	1%O2	22768	Heat shock protein beta-1	356.154	368.568	313.964	380.585	288.545	317.141
P62851	1	1	46.98	0.590546	0.296477	1.27269	1%O2	20%O2	13734	40S ribosomal protein S25	18.8773	31.8415	31.5595	19.4442	33.843	51.4276
P0DP23	1	1	35.77	0.597672	0.296477	2.32244	1%O2	20%O2	16827	Calmodulin-1	21.7281	25.1575	29.8191	124.984	10.5425	42.6161
P31943	1	1	74.89	0.5989	0.296477	1.02353	1%O2	20%O2	49198	Heterogeneous nuclear ribonucleoprotein H	431.089	402.889	414.384	398.473	447.157	432.101
P23588	2	2	124.62	0.600807	0.296477	1.19013	1%O2	20%O2	69110	Eukaryotic translation initiation factor 4B	20.9673	28.7647	50.111	26.4495	35.8885	56.488
P04040	1	1	39.56	0.601422	0.296477	1.1922	20%O2	1%O2	59719	Catalase	16.884	28.5952	35.8524	23.4824	18.3356	26.4017
Q99567	1	1	39.45	0.602812	0.296477	1.16281	1%O2	20%O2	83489	Nuclear pore complex protein Nup88	25.7946	18.1055	55.9977	55.7876	31.2552	29.1193
Q9NR30	1	1	50.8	0.627934	0.305512	6.67614	20%O2	1%O2	87290	Nucleolar RNA helicase 2	82.9203	1.3209	0	0	12.6183	0
Q16181	1	1	62.42	0.67649	0.324422	1.26792	20%O2	1%O2	50648	Septin-7	14.5087	42.0208	36.8054	25.459	31.2526	16.9009
P15880	2	2	115.39	0.677018	0.324422	1.09409	20%O2	1%O2	31305	40S ribosomal protein S2	142.174	124.966	10.5773	69.8644	89.8603	94.1103
P13647	4	1	246.4	0.687786	0.327422	1.04437	20%O2	1%O2	62340	Keratin, type II cytoskeletal 5	145.592	128.05	138.626	204.827	94.973	94.9546
P51991	1	1	41.16	0.698946	0.327422	1.03445	1%O2	20%O2	39571	Heterogeneous nuclear ribonucleoprotein A3	395.148	357.644	409.691	426.359	424.872	351.302
P62280	3	3	162.83	0.702346	0.327422	1.05529	20%O2	1%O2	18419	40S ribosomal protein S11	180.641	136.427	162.414	208.917	121.458	123.989
P27816	1	1	49.37	0.703489	0.327422	1.13049	1%O2	20%O2	120930	Microtubule-associated protein 4	57.5108	64.7367	73.9979	76.1753	48.523	97.1542
P49207	1	1	53.03	0.704597	0.327422	1.11102	1%O2	20%O2	13284	60S ribosomal protein L34	85.628	159.878	189.012	120.046	140.627	222.088
Q07666	2	2	104.42	0.707582	0.327422	1.0251	20%O2	1%O2	48197	KH domain-containing, RNA-binding, signal transduction-associated protein 1	231.047	240.434	267.312	251.645	219.971	249.09
Q14974	1	1	89.7	0.709149	0.327422	1.56603	20%O2	1%O2	97108	Importin subunit beta-1	110.94	0	0	0	55.2035	15.6384
P26599	1	1	30.13	0.718948	0.330262	1.37548	1%O2	20%O2	57186	Polypyrimidine tract-binding protein 1	260.948	184.736	321.038	218.96	657.448	178.202
P55072	6	4	267.02	0.723112	0.330497	1.02456	20%O2	1%O2	89266	Transitional endoplasmic reticulum ATPase	2361.97	2417.99	2814.59	2447.88	2438.2	2526.39
P06748	6	6	259.05	0.740621	0.334821	1.02588	20%O2	1%O2	32555	Nucleophosmin	364.278	311.295	360.074	368.889	308.185	332.442
P62805	2	2	117.35	0.751754	0.334821	1.02821	20%O2	1%O2	11360	Histone H4	1023.46	863.609	836.911	922.329	917.367	809.545
Q13185	1	1	43.46	0.752883	0.334821	1.07012	1%O2	20%O2	20798	Chromobox protein homolog 3	182.477	227.495	156.167	151.411	244.978	209.445
Q9C075	6	6	330.56	0.753557	0.334821	1.04594	1%O2	20%O2	48101	Keratin, type I cytoskeletal 23	423.706	447.393	296.225	423.45	339.233	458.264
P52597	1	1	66.2	0.754771	0.334821	1.24759	1%O2	20%O2	45643	Heterogeneous nuclear ribonucleoprotein F	63.0105	47.3688	26.666	23.1798	75.6309	72.1661
P61978	5	5	278.54	0.77132	0.337966	1.0164	20%O2	1%O2	50944	Heterogeneous nuclear ribonucleoprotein K	207.713	227.144	200.216	220.607	194.925	209.295
Q16629	2	2	86.73	0.772852	0.337966	1.03456	1%O2	20%O2	27350	Serine/arginine-rich splicing factor 7	148.562	145.456	190.446	185.265	172.852	143.088
O75369	8	6	475.46	0.773066	0.337966	1.025	20%O2	1%O2	277990	Filamin-B	527.174	474.608	504.306	614.541	453.461	401.347
Q8IY26	1	1	38.48	0.782669	0.34052	1.02635	20%O2	1%O2	32173	Phospholipid phosphatase 6	99.1207	93.6626	83.5685	113.049	77.8849	78.3246
O15230	1	1	78.42	0.7906	0.342324	1.07971	20%O2	1%O2	399479	Laminin subunit alpha-5	26.0888	6.7151	0.273449	13.3557	15.7799	1.49977
P23528	1	1	35.94	0.800258	0.343802	1.0182	20%O2	1%O2	18491	Cofilin-1	122.457	138.141	118.962	112.782	125.82	134.172
P62753	1	1	59.74	0.801611	0.343802	1.02738	1%O2	20%O2	28663	40S ribosomal protein S6	641.516	548.473	703.063	702.692	682.027	560.161
P11498	1	1	65.2	0.810962	0.346172	1.15336	20%O2	1%O2	129551	Pyruvate carboxylase, mitochondrial	77.8292	29.8827	31.4954	60.232	26.2317	34.2335
P00558	1	1	51.81	0.818305	0.347666	1.03015	1%O2	20%O2	44586	Phosphoglycerate kinase 1	235.199	251.045	310.205	236.707	317.975	265.776
P49411	2	2	81.28	0.841771	0.354637	1.02195	20%O2	1%O2	49510	Elongation factor Tu, mitochondrial	143.452	143.675	115.165	123.491	124.395	145.766
Q92896	3	3	202.94	0.842548	0.354637	1.01599	20%O2	1%O2	134464	Golgi apparatus protein 1	63.354	72.6556	60.4837	59.5541	66.6778	67.1697
Q7Z406	3	1	139.87	0.855023	0.358171	1.03282	1%O2	20%O2	227732	Myosin-14	72.1953	74.8643	70.9966	82.3363	83.0795	59.796
P39023	1	1	50.03	0.858862	0.358171	1.0135	1%O2	20%O2	46080	60S ribosomal protein L3	152.767	129.135	138.646	143.112	153.805	129.311
Q9BW27	2	1	113.26	0.864458	0.358851	1.00029	1%O2	20%O2	74971	Nuclear pore complex protein Nup85	52.1541	58.7812	58.34	37.3713	74.5869	57.3659
P32119	2	2	98.98	0.885022	0.364407	1.05788	1%O2	20%O2	21878	Peroxiredoxin-2	96.358	82.7247	95.1656	122.953	67.1774	99.9928
P46776	1	1	74.98	0.885895	0.364407	1.00434	20%O2	1%O2	16551	60S ribosomal protein L27a	249.309	208.5	220.846	293.162	179.279	203.28
Q9Y446	1	1	53.39	0.919401	0.375494	1.29688	1%O2	20%O2	87029	Plakophilin-3	53.4071	20.7137	25.5898	88.8427	25.0678	15.4025
P46779	3	3	143.37	0.921146	0.375494	1.0037	1%O2	20%O2	15738	60S ribosomal protein L28	235.5	200.44	199.296	221.668	210.502	205.416
Q5SXM2	1	1	46.76	0.92815	0.376652	1.0269	20%O2	1%O2	159335	snRNA-activating protein complex subunit 4	68.2758	61.5304	99.1081	58.4386	79.2937	85.1866
Q14247	2	2	86.43	0.941819	0.380493	1.00372	1%O2	20%O2	61549	Src substrate cortactin	416.433	426.832	336.368	409.65	357.56	416.817
Q15436	1	1	43.45	0.95352	0.382186	1.00334	1%O2	20%O2	86105	Protein transport protein Sec23A	57.6081	51.9076	20.8071	63.1694	49.4378	18.1504
P49257	2	2	104.29	0.954455	0.382186	1.0074	1%O2	20%O2	57513	Protein ERGIC-53	207.517	143.477	158.311	193.634	181.711	137.728
Q9BTX1	2	2	89.79	0.968516	0.386107	1.0412	20%O2	1%O2	76255	Nucleoporin NDC1	6.13748	15.6418	18.339	7.9391	15.63	14.9617
P02751	3	3	146.19	0.979831	0.388905	1.00232	1%O2	20%O2	272150	Fibronectin	213.41	214.167	198.061	233.808	210.243	183.039
Q9UPN4	1	1	48.02	0.991883	0.391969	1.011	20%O2	1%O2	122075	Centrosomal protein of 131 kDa	63.1828	49.2012	31.4891	63.5154	44.3266	34.4661
O75694	1	0	52.66				---	---	155100	Nuclear pore complex protein Nup155
P06703	1	0	43.71				---	---	10173	Protein S100-A6
P19013	2	0	87.52				---	---	56109	Keratin, type II cytoskeletal 4
P43686	1	0	48.93				---	---	47337	26S proteasome regulatory subunit 6B
P55769	1	0	55.77				---	---	14165	NHP2-like protein 1
Q3SY84	2	0	110.96				---	---	57256	Keratin, type II cytoskeletal 71
Q5XKE5	4	0	251.92				---	---	57800	Keratin, type II cytoskeletal 79
Q8N1N4	2	0	132.61				---	---	56830	Keratin, type II cytoskeletal 78
Q9NRL2	1	0	51.47				---	---	178592	Bromodomain adjacent to zinc finger domain protein 1A
Q15392	1	0	62.1				---	---	60062	Delta(24)-sterol reductase

## Sheet: Supplementary Table 2
Table S2. The panel shows host proteins whose abundance differed significantly between normoxic and hypoxic conditions. KRT9 and KRT10 were excluded from further analysis as contaminant proteins. “Infinity” indicates that only one condition was detected.
Gene Name	Mass	Unique peptides	p-value	Fold Change (1% O2/20% O2)	Subcellular localization
1% O2_Down
ACLY	120762	1	0.011795	Infinity	cytoplasm
MVP	99266	1	0.00053	2.9	cytoplasm, nucleus
KRT10	58792	2	0.002502	2.9	cell surface, cytoplasm
RRP12	143611	1	0.013775	2.9	nucleus, nucleus membrane
KRT9	62027	4	3.22e-06	2.5	cytoskeleton, cytosol, nucleus
AP1B1	104570	1	0.020971	2.4	golgi apparatus, cytoplasmic vesicle
KRT1	65999	1	0.004604	2.3	membrane, cytoplasm
KHSRP	73070	2	0.04648	2.2	nucleus, cytoplasm
1% O2_Up
MT2A	6037	1	0.001545	41.8	cytoplasm, cytosol, nucleus
ALDOA	39395	11	6e-07	2.6	cytoplasm
ALDH18A1	87248	8	2.25e-06	2.3	mitochondrion inner membrane
